# Supplementary material
Source: HighWire-hosted journal article supplement (https://bmjopen.bmj.com/content/14/1/e077978)

## Supplementary material. Figure 1. Confirmatory Factor Analysis with original 26 items LwLTCs scale

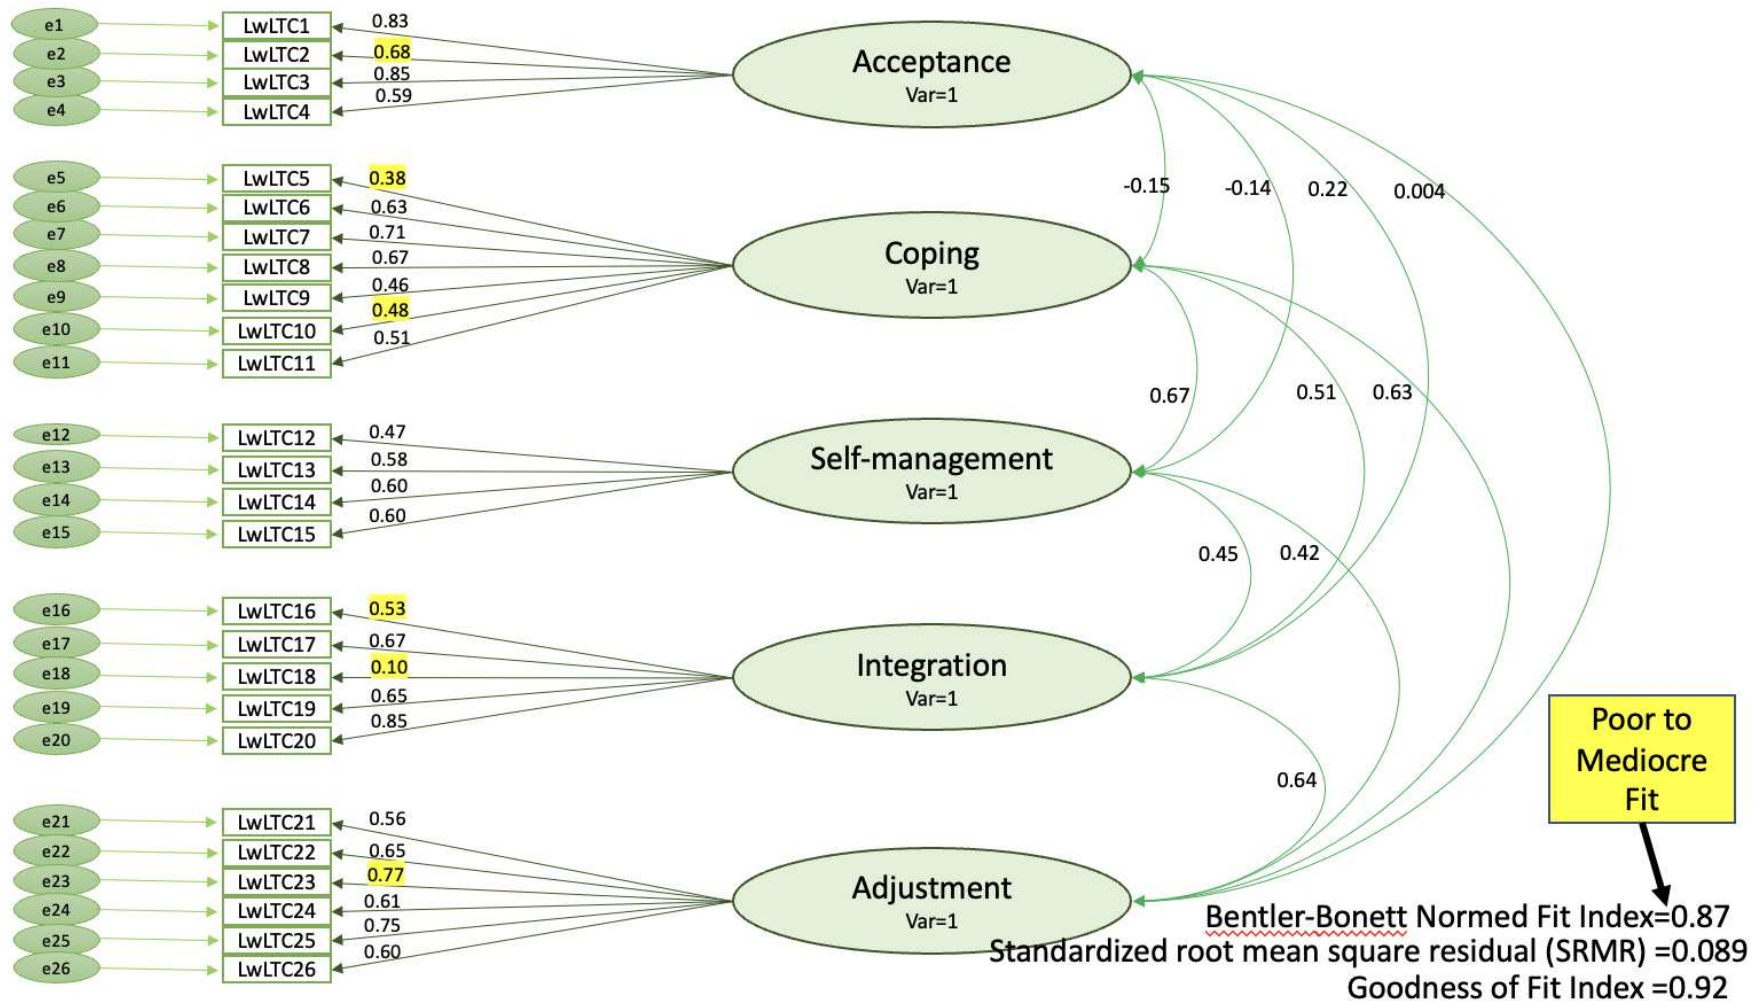

**Supplementary material. Figure 2. Confirmatory Factor Analysis with suggested 20 items LwLTCs scale**

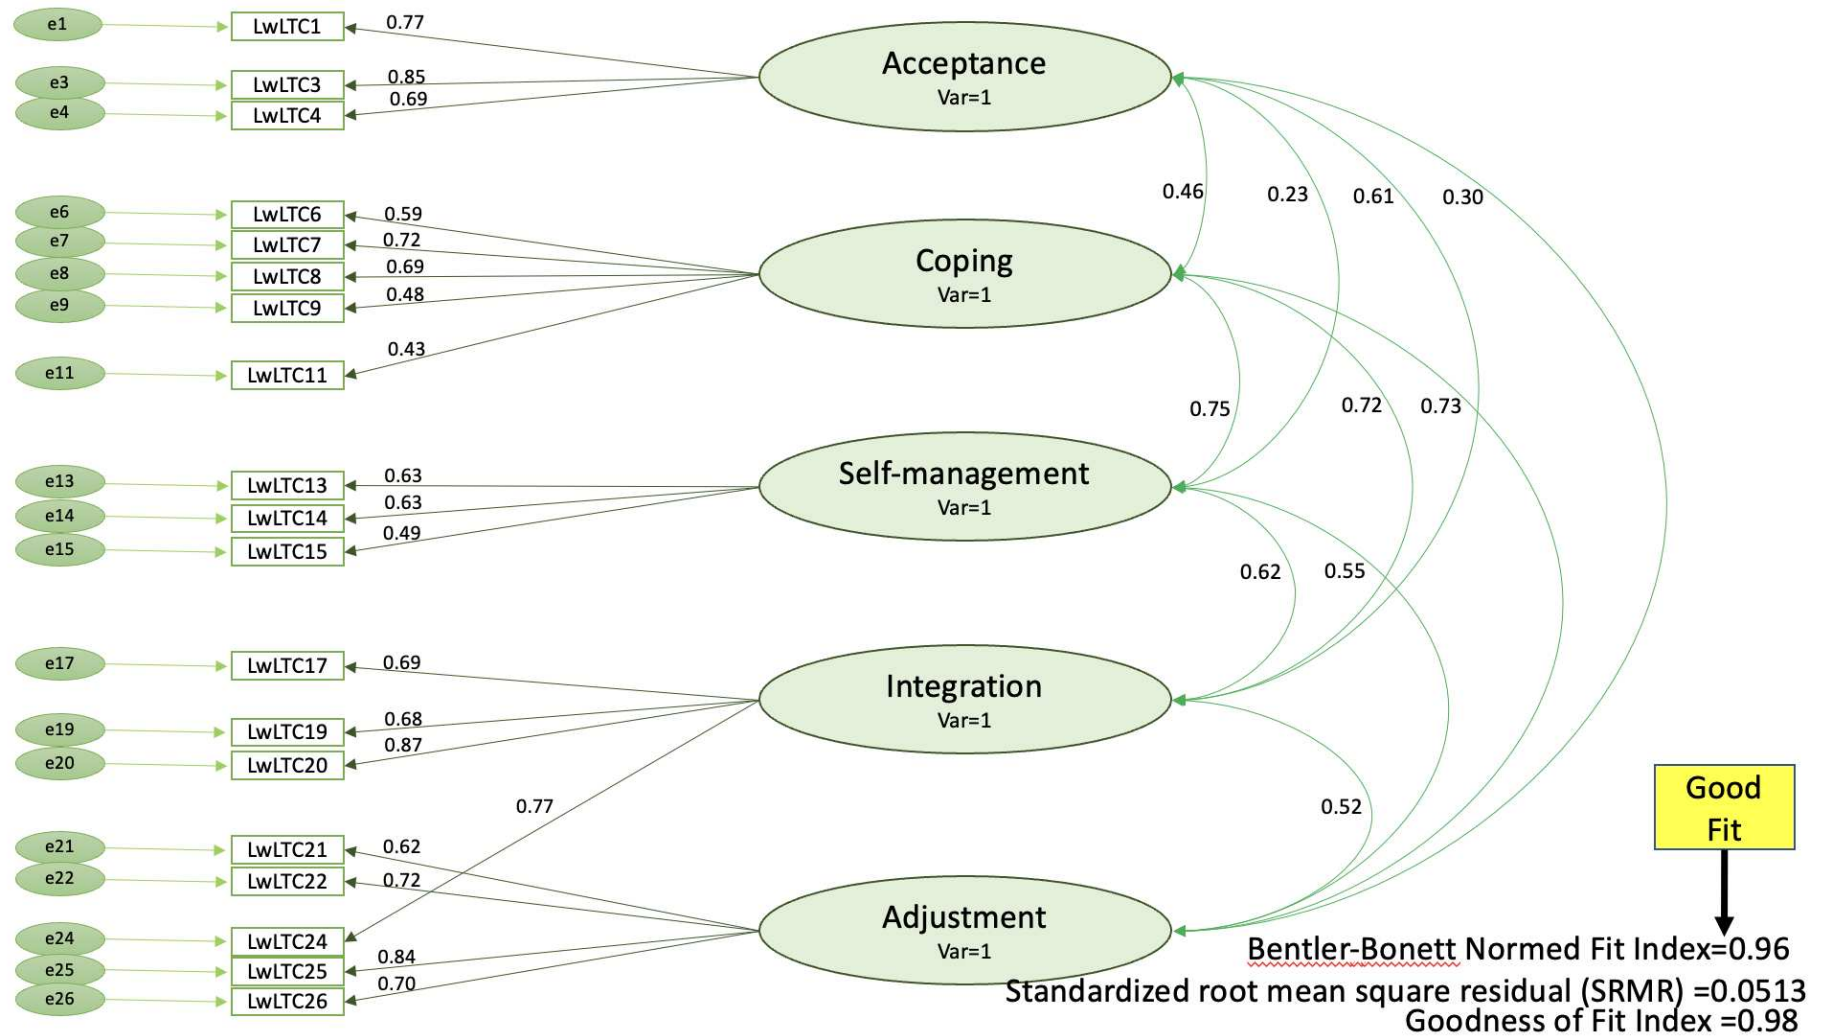

Supplement: inline-supplementary-material-1 [file inline-supplementary-material-1.pdf]
